# Supplementary material for: A “turn-off” red-emitting fluorophore for nanomolar detection of heparin
Source: Royal Society of Chemistry journal article supplement (doi:10.1039/c7cp06300h), 2018-01-01
Supplement: c7cp06300h1.pdf [file c7cp06300h1.pdf]

## Supporting Information

### A “Turn-Off” Red-emitting Fluorophore for Nanomolar Detection of Heparin

Palash Jana<sup>†</sup>, Mithun Radhakrishna<sup>‡</sup>, Saumyakanti Khatua<sup>†</sup> and Sriram Kanvah<sup>†\*</sup>

<sup>†</sup>Department of Chemistry, Indian Institute of Technology Gandhinagar, Palaj, Gandhinagar

382 355, India; kanvah@gatech.edu

<sup>‡</sup>Department of Chemical Engineering, Indian Institute of Technology Gandhinagar, Palaj,  
Gandhinagar 382 355, India

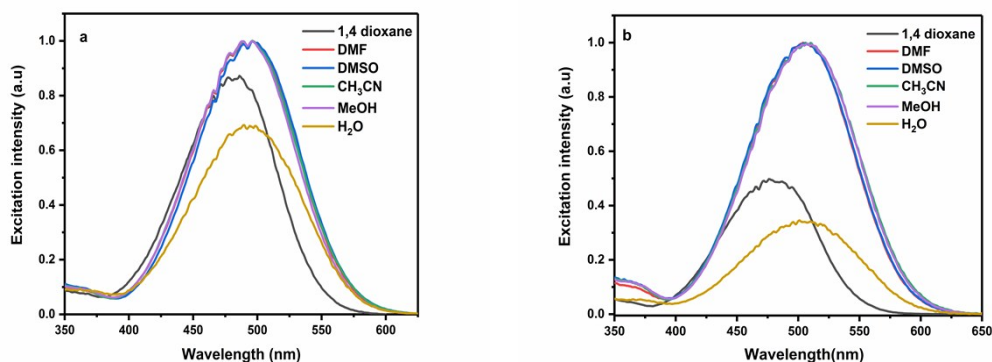

**Fig.S1** Excitation spectra of a) monocation (**1**) and b) dication (**2**) in different solvents.

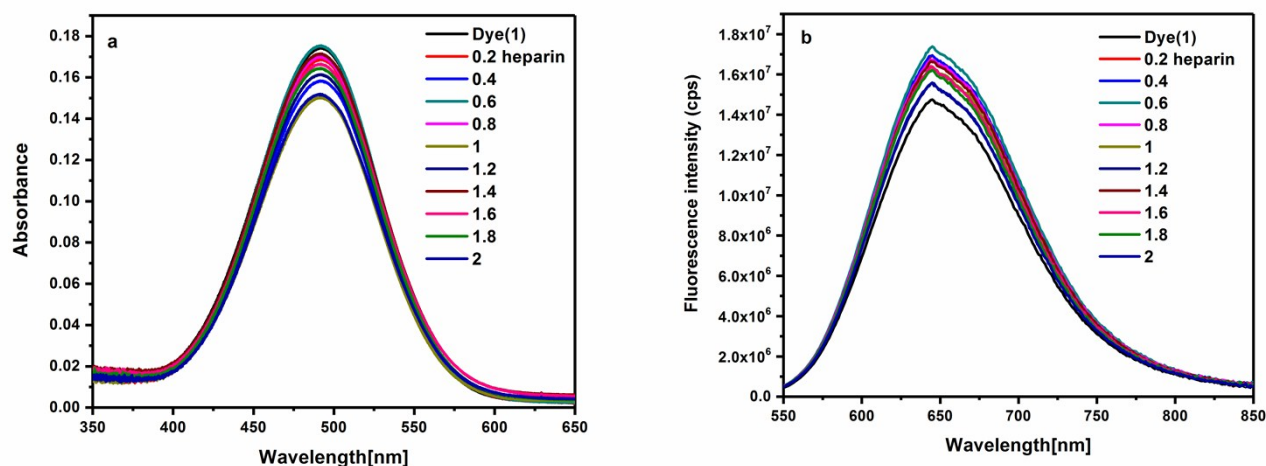

**Fig.S2** a) Absorption spectra b) Fluorescence spectra of compound **1** through the addition of heparin solution from 0- 2 $\mu\text{g/mL}$  with HEPES buffer solution (5mM pH 7.4).

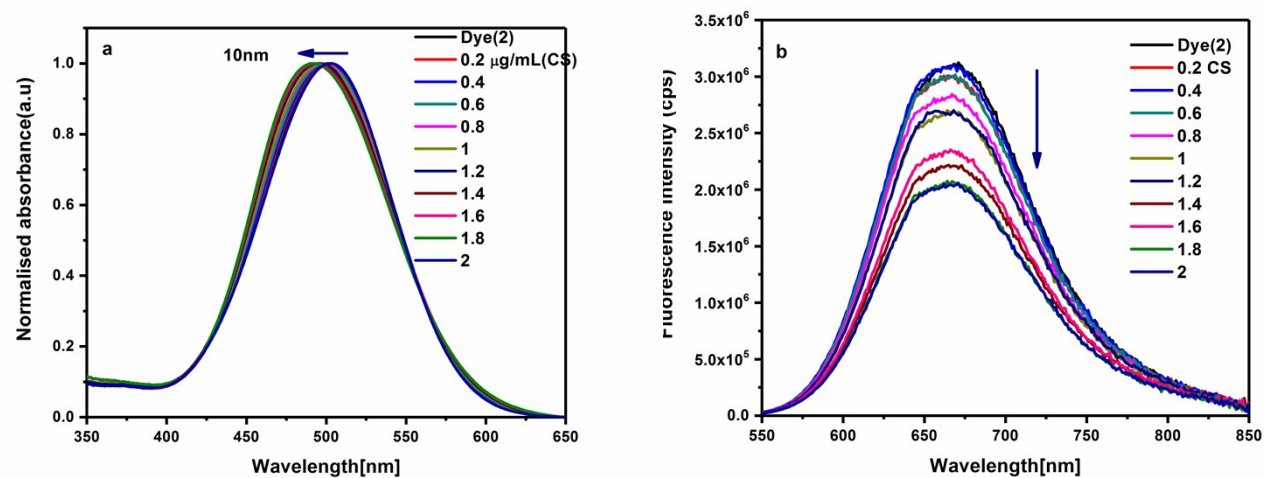

**Fig.S3** a)Absorption spectra b) Fluorescence spectra of compound **2** through the addition of Chondroitin sulfate solution from 0 – 2 $\mu\text{g/mL}$  in HEPES buffer solution (5mM, pH 7.4).

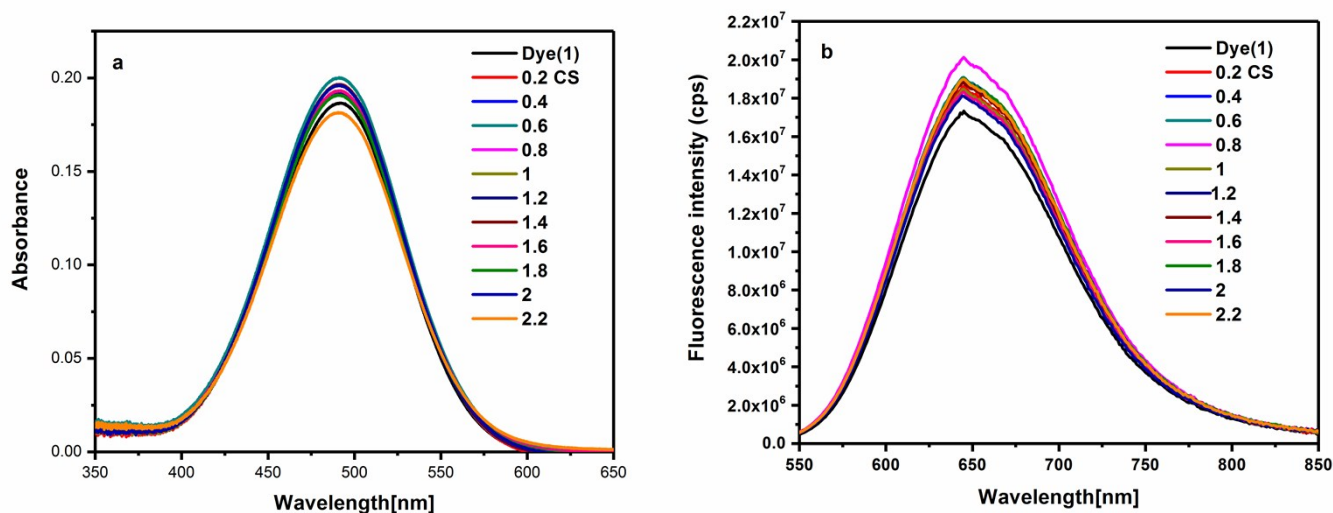

**Fig.S4** a) Absorption spectra b) Fluorescence spectra of compound **1** through the addition of chondroitin sulfate solution from 0- 2 $\mu\text{g/mL}$  with HEPES buffer solution (5mM, pH 7.4).

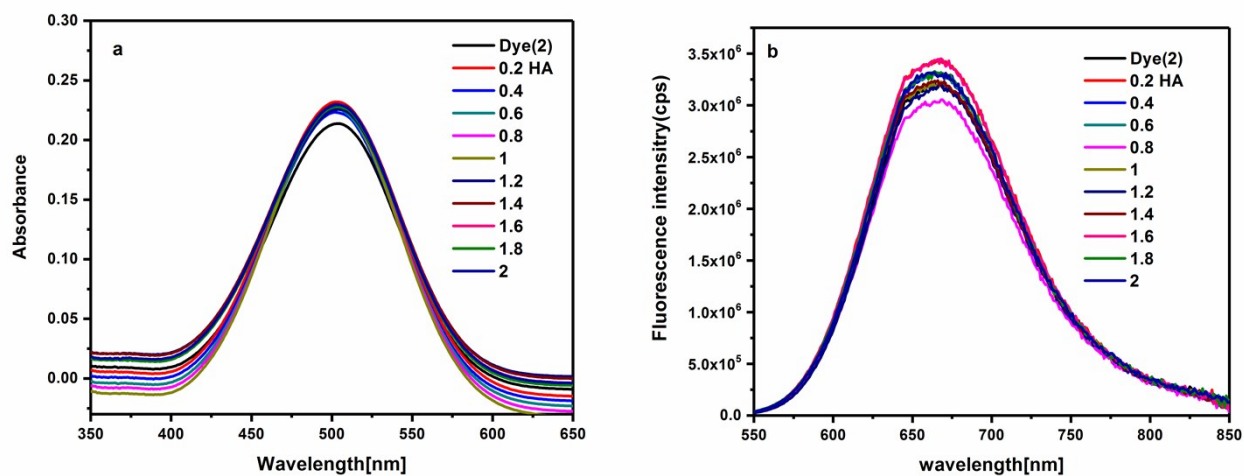

**Fig.S5** a) Absorption spectra b) Fluorescence spectra of compound (**2**) through the addition of hyaluronic acid solution from 0 – 2 $\mu\text{g/mL}$  in HEPES buffer solution.

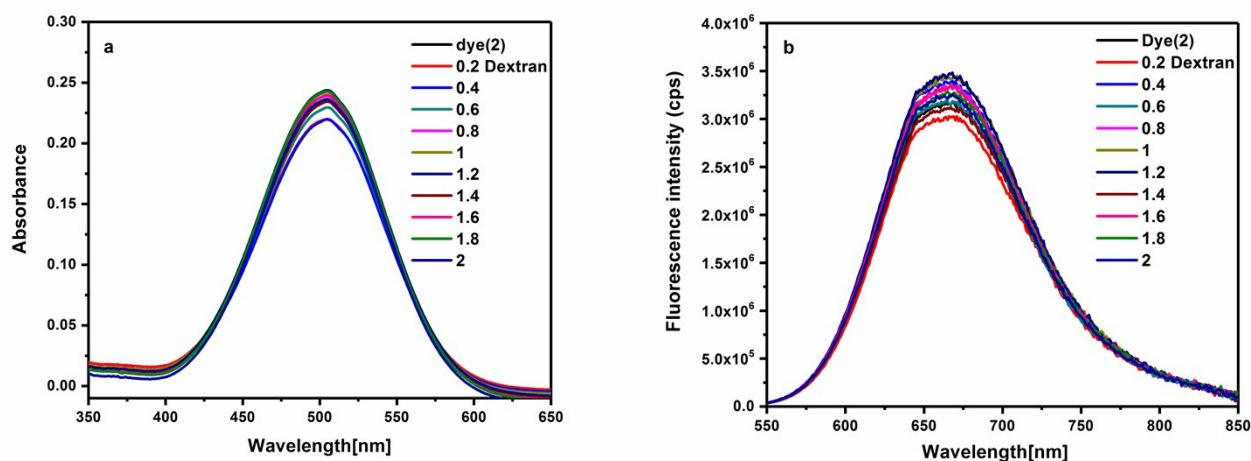

**Fig.S6** a) Absorption spectra b) Fluorescence spectra of compound **2** through the addition of Dextran solution from 0 – 2μg/mL in HEPES buffer solution.

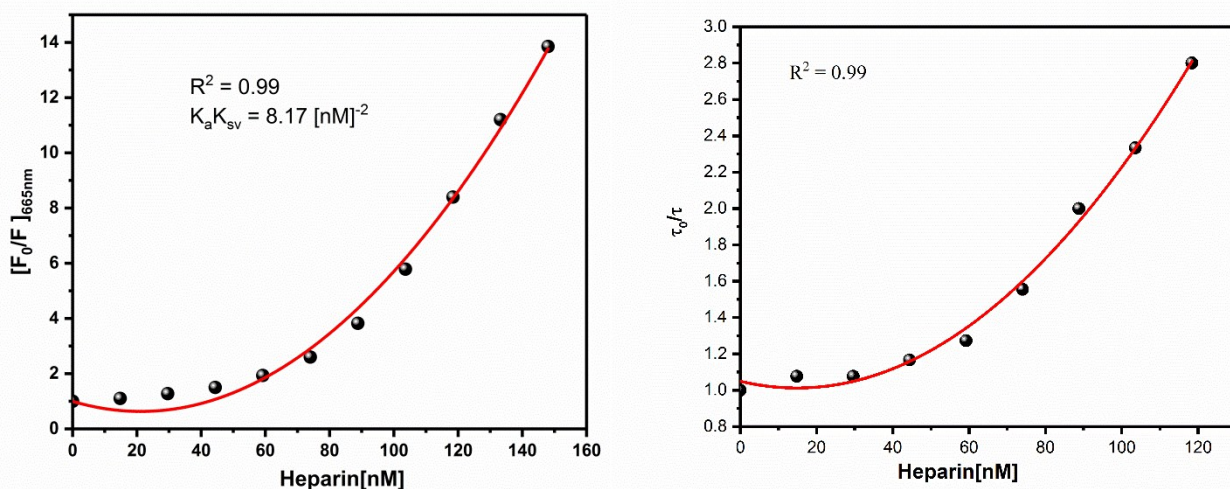

**Fig S7:** Stern-Volmer quenching plot of emission response of dication (**2**) with increasing concentration of Heparin.

**Table S1** Lifetime decay of dye (2) with heparin in HEPES buffer at 470 nm excitation

| Sr.No. | Heparin ( $\mu\text{g/mL}$ ) | $\tau_1(\text{ns})$ | $\tau_2(\text{ns})$ | S1(%) | S2(%) | $\chi^2$ |
|--------|------------------------------|---------------------|---------------------|-------|-------|----------|
| 1      | 0                            | 0.20                |                     | 100   | 0     | 0.95     |
| 2      | 0.2                          | 0.14                | 0.34                | 51.86 | 48.14 | 0.94     |
| 3      | 0.4                          | 0.13                | 0.36                | 56.86 | 43.14 | 1.10     |
| 4      | 0.6                          | 0.11                | 0.37                | 58.04 | 41.96 | 1.2      |
| 5      | 0.8                          | 0.09                | 0.43                | 59.87 | 40.13 | 1.06     |
| 6      | 1                            | 0.08                | 0.45                | 61.24 | 38.76 | 1.29     |
| 7      | 1.2                          | 0.07                | 0.48                | 64.82 | 35.18 | 1.32     |
| 8      | 1.4                          | 0.06                | 0.51                | 65.12 | 34.88 | 1.43     |
| 9      | 1.6                          | 0.06                | 0.56                | 68.11 | 31.89 | 1.33     |

**Table S2** Fluorescence Lifetime data of (2) with different concentration of heparin at 515nm excitation.

| Sr. No. | Heparin ( $\mu\text{g/mL}$ ) | $\tau_1(\text{ns})$ | $\tau_2(\text{ns})$ | S1(%) | S2(%) | $\chi^2$ |
|---------|------------------------------|---------------------|---------------------|-------|-------|----------|
| 1       | 0                            | 0.14                | -                   | 100   |       | 1.02     |
| 2       | 0.2                          | 0.13                | -                   | 100   |       | 1.09     |
| 3       | 0.4                          | 0.13                | -                   | 100   |       | 1.05     |
| 4       | 0.6                          | 0.12                | -                   | 100   |       | 1.05     |
| 5       | 0.8                          | 0.11                | -                   | 100   |       | 1.38     |
| 6       | 1                            | 0.09                | 0.53                | 85.30 | 14.70 | 0.91     |
| 7       | 1.2                          | 0.07                | 0.57                | 84.44 | 15.56 | 0.96     |
| 8       | 1.4                          | 0.06                | 0.64                | 84.80 | 15.20 | 0.98     |
| 9       | 1.6                          | 0.05                | 0.76                | 83.51 | 16.49 | 1.09     |
| 10      | 1.8                          | 0.05                | 0.95                | 80.67 | 19.33 | 1.2      |
| 11      | 2.0                          | 0.05                | 0.91                | 77.65 | 22.35 | 1.19     |

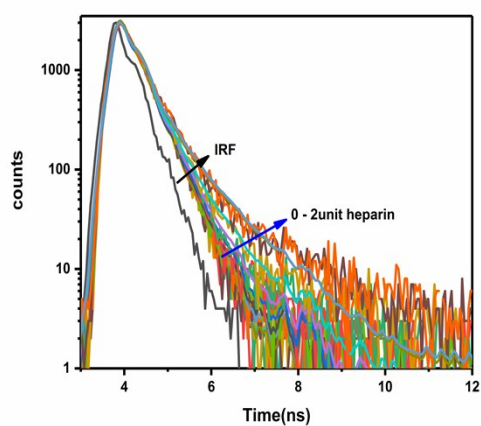

**Fig.S8** Lifetime decay of dye (2) with heparin in HEPES buffer at 515 nm excitation

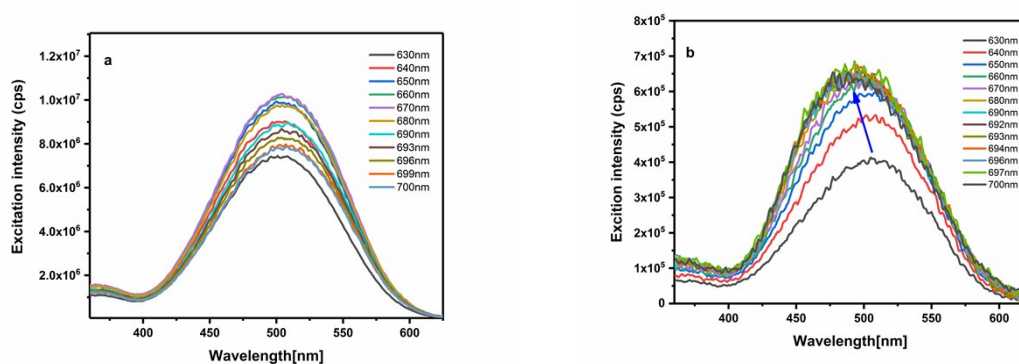

**Fig.S9:** The excitation spectra of dye (2) in the a) absence and b) presence of heparin at different emission wavelengths.

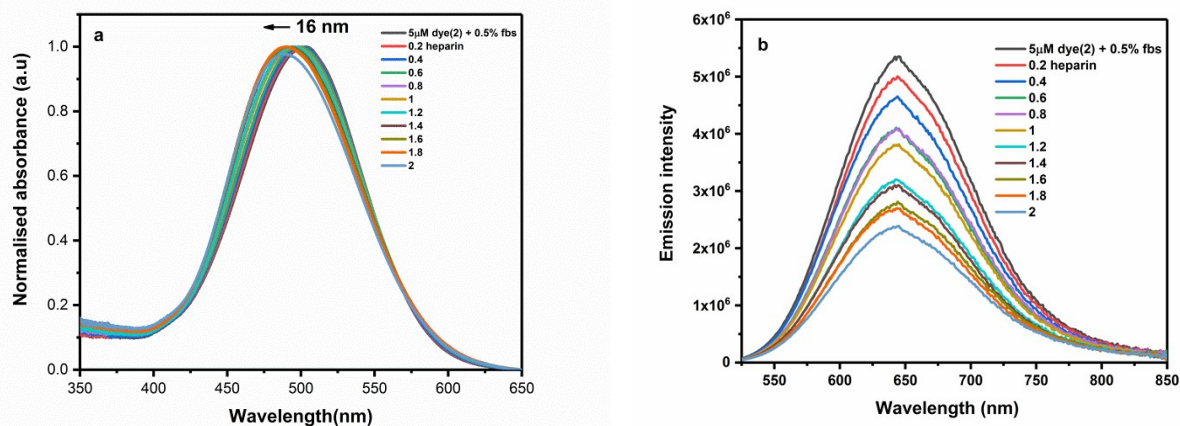

**Fig.S10** a) Absorption spectra b) fluorescence spectra of compound (2) through the addition of a solution of heparin from 0 – 2  $\mu\text{g/mL}$  in 0.5% FBS serum in HEPES buffer solution.



# NMR spectra

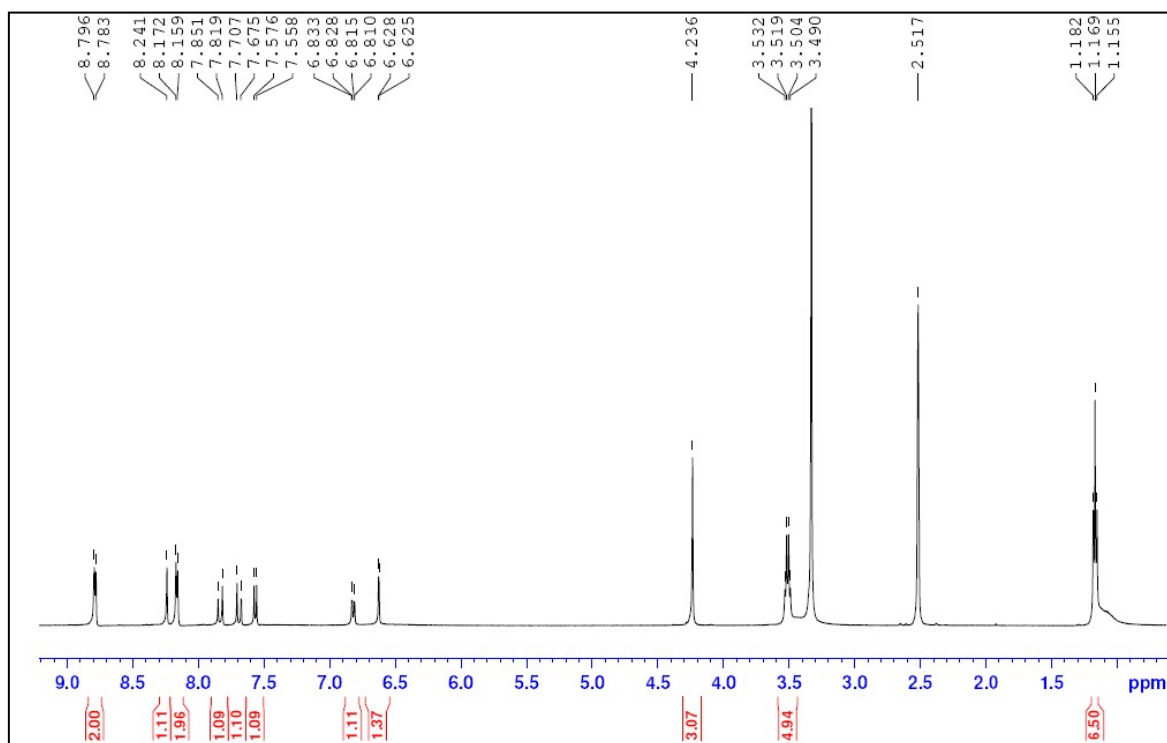

Fig.S11 <sup>1</sup>H-NMR spectra of compound 1

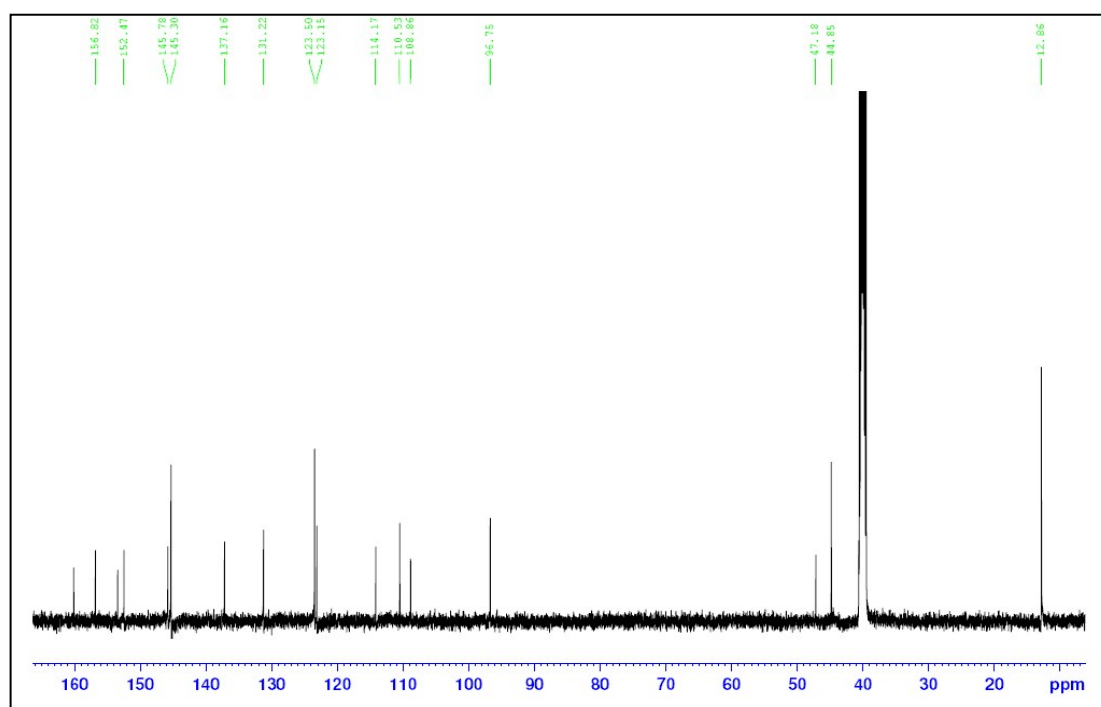

Fig.S12 <sup>13</sup>C-NMR spectra of compound 1

**Fig.S13**  
**<sup>1</sup>H-NMR**  
**spectra of**  
**compound 2**

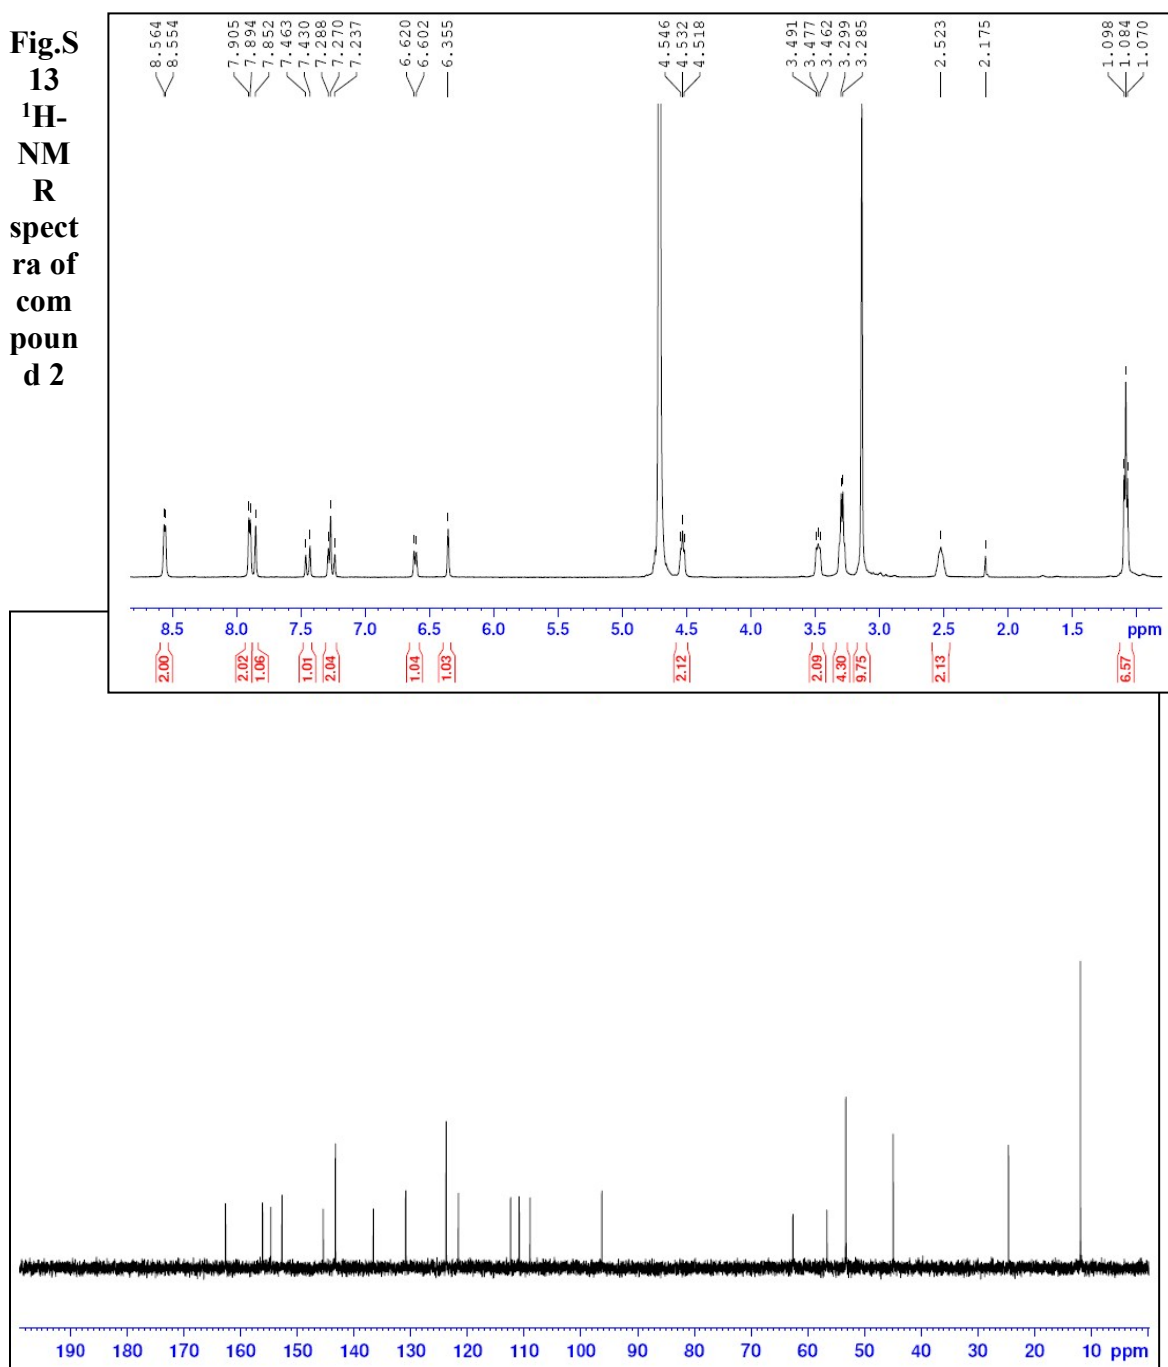

**Fig.S14 <sup>13</sup>C-NMR spectra of compound 2**
